# Supplementary material for: Challenges, Economics, and Sustainability of Sheep and Goat Farming in Drylands
Source: Preprints.org preprint supplement (doi:10.20944/preprints202403.1478.v1), 2024-03-25
Supplement: Supplementary file 3 [file supplementary]

## Sheet: data set
Se	Age of the Breeder /Year	Level of education	Number of family members	Number of males	Number of females	Fixed costs /JD	Variable costs /JD	Land ownership	Activity assets /JD	year Activity debts/last year /JD	Years of experience	Annual return	Revenue /Animal	Land cultivation	Fodder cultivation	Total animals	Total sheep	Sheep male	Non-lambing	Sheep female	Lambs	Lamb sales	Lamb mortality	Total goats	Goats male	Non-kidding	Goats female	Kids	Kids sales	Kids mortality	Males Replacement (mated)	Weaning age/day	Mortality Months	Mortality age /month	Other animals
1	66	2	10	6	4	6000	400	2	6800	600	14	600	60	2	2	419	248	5	11	116	60	52	4	171	4	7	80	42	33	5	2	70	12	2	1
2	50	3	9	7	2	8000	1600	1	4000	0	15	3000	37	1	2	633	250	5	11	117	71	36	10	383	9	16	179	89	75	15	1	60	1	11	2
3	60	3	6	4	2	7000	1500	2	1850	500	30	2000	35	2	2	422	239	5	12	111	65	35	11	183	5	8	85	38	33	14	1	65	1	12	2
4	72	1	10	7	3	6500	500	1	6000	0	23	1450	40	1	1	697	332	8	14	155	95	45	15	365	9	16	170	86	74	10	2	70	12	14	1
5	65	2	5	4	1	7500	500	1	4900	0	12	650	40	2	2	662	248	5	11	116	75	34	7	414	10	18	193	70	63	60	1	75	12	13	1
6	65	2	8	5	3	7500	500	1	8500	0	20	1500	40	1	1	407	219	5	10	102	60	35	7	188	5	7	88	44	35	9	2	70	12	10	1
7	65	2	6	4	2	7500	500	1	7500	0	25	1300	40	2	2	407	231	5	10	108	55	46	7	176	5	7	82	42	31	9	1	72	1	13	1
8	60	3	7	4	3	7500	600	2	7500	550	12	1400	60	2	2	494	305	6	13	143	91	48	4	189	6	9	87	45	38	4	1	70	1	2	1
9	65	2	7	4	3	7500	500	1	6700	0	12	1500	40	1	2	557	330	8	14	154	92	49	13	227	6	9	106	55	34	17	1	45	12	15	1
10	70	1	10	6	4	7500	500	1	4850	0	25	1500	40	1	2	638	321	8	13	150	90	43	17	317	8	13	148	65	65	18	1	70	12	12	1
11	65	1	6	4	2	7500	500	2	5100	400	25	1500	40	2	2	603	339	9	14	158	95	46	17	264	7	11	123	60	45	18	1	55	12	14	1
12	65	3	10	6	4	7500	600	1	6400	0	23	850	40	1	1	495	302	8	16	139	85	47	7	193	6	9	89	45	34	10	2	70	12	11	1
13	55	3	5	2	3	7500	500	1	8500	0	12	850	40	1	1	546	323	9	12	151	93	51	7	223	5	10	104	54	41	9	1	75	12	12	1
14	65	2	8	5	3	7500	600	1	5800	0	12	1500	50	1	1	590	353	9	18	163	92	54	17	237	6	9	111	50	42	19	1	70	12	8	1
15	65	2	7	4	3	7500	500	1	6800	0	12	1500	40	2	2	435	242	6	10	113	59	47	7	193	5	8	90	44	31	15	1	60	1	13	1
16	55	3	10	9	1	7500	500	1	7500	0	12	1500	40	1	1	564	241	6	11	112	55	40	17	323	9	12	151	70	62	19	1	70	12	12	1
17	55	3	8	5	3	7500	600	2	6800	800	15	1450	40	2	1	377	219	6	9	102	56	40	6	158	4	8	73	35	30	8	1	90	1	9	2
18	45	2	8	5	3	7500	600	2	8500	450	20	1300	30	1	1	373	261	7	12	121	65	50	6	112	4	6	51	25	18	8	1	85	1	7	2
19	60	3	5	4	1	4000	300	1	7400	0	20	1400	45	2	2	380	251	5	12	117	59	50	8	129	5	8	58	30	20	8	1	70	12	8	2
20	55	2	5	4	1	4000	300	1	6500	0	20	1350	45	2	2	400	262	8	14	120	64	50	6	138	6	6	63	30	25	8	1	90	12	7	2
21	66	2	9	4	5	5000	400	1	7020	0	30	2500	45	1	2	583	331	10	17	152	79	65	8	252	6	12	117	60	45	12	1	70	12	12	1
22	76	2	10	4	6	6000	500	1	5600	0	30	2500	45	1	2	591	319	8	15	148	75	66	7	272	7	17	124	62	50	12	1	65	12	11	1
23	65	1	9	4	5	6500	500	2	7500	700	12	1500	40	1	1	504	239	6	19	107	56	48	3	265	6	13	123	65	51	7	1	70	12	10	1
24	60	1	8	4	4	6000	400	1	6500	0	30	2000	60	2	2	542	298	8	12	139	74	60	5	244	6	18	110	65	39	6	2	60	1	2	1
25	65	1	10	8	2	7500	500	1	7400	0	12	1400	40	1	2	446	253	6	11	118	56	45	17	193	5	8	90	40	32	18	1	70	12	12	1
26	60	2	7	4	3	6000	300	1	6000	0	14	2000	40	1	1	477	302	8	14	140	75	60	5	175	4	7	82	45	30	7	1	75	1	2	1
27	60	3	7	4	3	7000	400	2	5000	650	14	2000	30	2	2	467	307	7	12	144	78	60	6	160	5	7	74	42	30	2	1	70	1	2	1
28	45	3	7	4	3	7000	500	2	6400	450	15	1500	40	1	2	357	131	4	7	60	30	23	7	226	6	8	106	51	46	9	2	80	1	1	2
29	62	2	7	4	3	7500	500	2	7500	720	30	2500	45	1	1	418	216	5	9	101	52	42	7	202	5	7	95	49	37	9	1	70	12	12	1
30	60	2	9	4	5	5600	600	1	6500	0	30	1500	35	2	2	459	300	6	12	141	74	60	7	159	5	8	73	38	30	5	2	75	1	1	1
31	62	3	7	3	4	7500	500	1	8200	0	20	2500	55	1	1	449	232	7	9	108	55	46	7	217	6	9	101	52	40	9	1	70	12	12	1
32	60	2	7	4	3	5071	450	2	4200	480	25	1500	50	1	1	521	261	8	11	121	65	50	6	260	7	15	119	60	50	9	1	80	1	10	1
33	50	2	5	2	3	7000	500	2	6800	630	25	2000	45	1	1	362	232	7	9	108	56	45	7	130	4	4	61	30	22	9	1	70	12	14	1
34	70	2	8	4	4	5000	600	1	7500	0	30	2000	38	1	1	482	327	9	14	152	79	65	8	155	4	7	72	41	30	1	2	75	12	12	1
35	60	3	7	3	4	6000	500	1	5500	0	30	1500	40	2	2	534	310	9	13	144	75	62	7	224	5	9	105	55	43	7	2	70	1	1	1
36	51	3	5	3	2	5000	400	1	5400	0	30	2000	45	1	1	678	300	8	12	140	74	58	8	378	9	19	175	90	75	10	1	65	12	12	1
37	51	3	7	3	4	5000	400	1	5500	0	30	2000	35	1	1	666	325	7	14	152	90	55	7	341	8	17	158	80	68	10	1	60	12	13	1
38	40	2	7	5	2	6000	500	2	5600	445	30	1500	45	1	1	500	323	8	13	151	80	65	6	177	4	9	82	44	30	8	1	90	1	10	2
39	45	2	7	5	2	6000	500	1	7500	0	20	1500	40	1	1	557	368	10	16	171	90	75	6	189	6	7	88	50	30	8	1	75	1	9	2
40	45	3	5	2	3	500	400	2	7500	750	30	2000	50	1	1	526	351	9	14	164	92	65	7	175	5	8	81	42	30	9	1	85	1	1	2
41	65	2	5	2	3	7500	500	1	5500	0	12	1500	40	2	2	598	381	11	16	177	85	75	17	217	5	8	102	45	38	19	2	45	12	12	1
42	50	3	8	4	4	5000	1650	1	6800	0	25	2000	60	1	1	424	298	8	14	138	70	62	6	126	4	6	58	30	20	8	1	60	1	7	2
43	60	3	7	4	3	5061	450	1	6000	0	25	1500	50	1	1	526	345	9	14	161	90	65	6	181	5	8	84	46	30	8	1	65	1	8	2
44	46	3	8	4	4	7000	500	2	6050	840	16	1400	45	1	2	329	142	4	6	66	35	25	6	187	6	7	87	45	34	8	2	70	1	1	2
45	55	3	8	5	3	7500	500	1	6800	0	13	1000	20	1	1	508	309	6	17	143	91	46	6	199	6	9	92	44	35	13	2	75	12	12	1
46	60	3	9	4	5	7500	600	1	1950	0	14	1500	30	1	1	541	333	8	13	156	92	58	6	208	7	11	95	49	33	13	2	80	12	14	1
47	55	3	7	4	3	8000	500	2	4300	580	14	1000	45	2	2	622	325	9	18	149	70	65	14	297	9	16	136	80	42	14	1	90	1	2	1
48	65	2	5	3	2	7500	500	1	6000	0	12	1500	40	1	1	594	387	10	17	180	90	78	12	207	5	10	96	45	38	13	1	45	12	11	1
49	55	2	9	5	4	7500	500	1	7500	0	12	1500	40	2	2	391	156	6	8	71	35	24	12	235	6	15	107	48	42	17	1	65	12	10	1
50	50	2	6	3	3	5500	600	1	6500	0	10	850	45	2	2	500	273	5	16	126	65	55	6	227	7	14	103	52	44	7	2	70	1	1	1
51	65	2	7	4	3	7500	500	1	8400	0	12	1500	40	1	1	446	251	5	12	117	65	44	8	195	5	8	91	46	35	10	1	85	12	12	1
52	65	2	7	3	4	7500	600	1	7000	0	20	1500	50	1	1	511	274	8	16	125	69	49	7	237	6	9	111	55	44	12	2	60	12	11	1
53	45	2	5	3	2	7000	500	2	8100	300	25	2000	50	1	1	490	270	6	18	123	72	44	7	220	7	11	101	52	40	9	1	70	12	8	2

## Sheet: BREEDER INDICATORS
Se	Age of the Breeder /Year	Level of education	Number of family members	Number of males	Number of females		Coding education levels	Uneducated = 1, Primary = 2, and Basic = 3
38	40	2	7	5	2
18	45	2	8	5	3		DATA KHALED;
28	45	3	7	4	3		INPUT SE AGE LE FA MA FE;
39	45	2	7	5	2		CARDS;
40	45	3	5	2	3		…
53	45	2	5	3	2		;
44	46	3	8	4	4		PROC FREQ DATA=KHALED;
2	50	3	9	7	2		TABLES LE /NOCUM NOROW NOCOL;
33	50	2	5	2	3		RUN;
42	50	3	8	4	4		PROC MEANS N MEAN STDERR; VAR AGE FA MA FE;
50	50	2	6	3	3		RUN;
36	51	3	5	3	2
37	51	3	7	3	4
13	55	3	5	2	3		LE	Frequency	Percent
16	55	3	10	9	1		1	6	11.32
17	55	3	8	5	3		2	26	49.06
20	55	2	5	4	1		3	21	39.62
45	55	3	8	5	3
47	55	3	7	4	3
49	55	2	9	5	4		Variable	N	Mean	Std Error
3	60	3	6	4	2		AGE	53	58.717	1.11083
8	60	3	7	4	3		FA	53	7.33962	0.220409
19	60	3	5	4	1		MA	53	4.24528	0.190305
24	60	1	8	4	4		FE	53	3.09434	0.150626
26	60	2	7	4	3
27	60	3	7	4	3
30	60	2	9	4	5
32	60	2	7	4	3
35	60	3	7	3	4
43	60	3	7	4	3
46	60	3	9	4	5
29	62	2	7	4	3
31	62	3	7	3	4
5	65	2	5	4	1
6	65	2	8	5	3
7	65	2	6	4	2
9	65	2	7	4	3
11	65	1	6	4	2
12	65	3	10	6	4
14	65	2	8	5	3
15	65	2	7	4	3
23	65	1	9	4	5
25	65	1	10	8	2
41	65	2	5	2	3
48	65	2	5	3	2
51	65	2	7	4	3
52	65	2	7	3	4
1	66	2	10	6	4
21	66	2	9	4	5
10	70	1	10	6	4
34	70	2	8	4	4
4	72	1	10	7	3
22	76	2	10	4	6

## Sheet: Economic indicators
Se	Fixed costs /JD	Variable costs /JD	Land ownership	Activity assets /JD	year Activity debts/last year /JD	Experience /YEARS	Annual return	Revenue /Animal	Land cultivation (CROPS)	Fodder cultivation	(AD/AA)% [ADAA]		Coding Land ownership	Land owner = 1, and Land tenant = 2		Coding Land cultivation	Farmer = 1, and No farmer = 2		Coding Fodder cultivation	plant fodder = 1, and not plant fodder = 2
50	5500	600	1	6500	0	10	850	45	2	2	0
5	7500	500	1	4900	0	12	650	40	2	2	0		DATA KHALED;
8	7500	600	2	7500	550	12	1400	60	2	2	7.33333		INPUT SE FCO VCO LO AA AD EX AR RA LC FC ADAA;
9	7500	500	1	6700	0	12	1500	40	1	2	0		CARDS;
13	7500	500	1	8500	0	12	850	40	1	1	0		…
14	7500	600	1	5800	0	12	1500	50	1	1	0		;
15	7500	500	1	6800	0	12	1500	40	2	2	0		PROC FREQ DATA=KHALED;
16	7500	500	1	7500	0	12	1500	40	1	1	0		TABLES LO LC FC /NOCUM NOROW NOCOL;
23	6500	500	2	7500	700	12	1500	40	1	1	9.33333		RUN;
25	7500	500	1	7400	0	12	1400	40	1	2	0		PROC MEANS N MEAN STDERR; VAR FCO VCO AA AD EX AR RA ADAA;
41	7500	500	1	5500	0	12	1500	40	2	2	0		RUN;
48	7500	500	1	6000	0	12	1500	40	1	1	0
49	7500	500	1	7500	0	12	1500	40	2	2	0		LO	Frequency	Percent
51	7500	500	1	8400	0	12	1500	40	1	1	0		1	36	67.92
45	7500	500	1	6800	0	13	1000	20	1	1	0		2	17	32.08
1	6000	400	2	6800	600	14	600	60	2	2	8.82353
26	6000	300	1	6000	0	14	2000	40	1	1	0		LC	Frequency	Percent
27	7000	400	2	5000	650	14	2000	30	2	2	13		1	35	66.04
46	7500	600	1	1950	0	14	1500	30	1	1	0		2	18	33.96
47	8000	500	2	4300	580	14	1000	45	2	2	13.4884
2	8000	1600	1	4000	0	15	3000	37	1	2	0		FC	Frequency	Percent
17	7500	600	2	6800	800	15	1450	40	2	1	11.7647		1	28	52.83
28	7000	500	2	6400	450	15	1500	40	1	2	7.03125		2	25	47.17
44	7000	500	2	6050	840	16	1400	45	1	2	13.8843
6	7500	500	1	8500	0	20	1500	40	1	1	0		Variable	N	Mean	Std Error
18	7500	600	2	8500	450	20	1300	30	1	1	5.29412		FCO	53	6560.98	187.824
19	4000	300	1	7400	0	20	1400	45	2	2	0		VCO	53	553.774	36.5127
20	4000	300	1	6500	0	20	1350	45	2	2	0		AA	53	6375.85	197.686
31	7500	500	1	8200	0	20	2500	55	1	1	0		AD	53	185.755	39.2208
39	6000	500	1	7500	0	20	1500	40	1	1	0		EX	53	19.9245	0.984218
52	7500	600	1	7000	0	20	1500	50	1	1	0		AR	53	1599.06	65.7861
4	6500	500	1	6000	0	23	1450	40	1	1	0		RA	53	42.6415	1.06368
12	7500	600	1	6400	0	23	850	40	1	1	0		ADAA	53	3.33472	0.77751
7	7500	500	1	7500	0	25	1300	40	2	2	0
10	7500	500	1	4850	0	25	1500	40	1	2	0
11	7500	500	2	5100	400	25	1500	40	2	2	7.84314
32	5071	450	2	4200	480	25	1500	50	1	1	11.4286
33	7000	500	2	6800	630	25	2000	45	1	1	9.26471
42	5000	1650	1	6800	0	25	2000	60	1	1	0
43	5061	450	1	6000	0	25	1500	50	1	1	0
53	7000	500	2	8100	300	25	2000	50	1	1	3.7037
3	7000	1500	2	1850	500	30	2000	35	2	2	27.027
21	5000	400	1	7020	0	30	2500	45	1	2	0
22	6000	500	1	5600	0	30	2500	45	1	2	0
24	6000	400	1	6500	0	30	2000	60	2	2	0
29	7500	500	2	7500	720	30	2500	45	1	1	9.6
30	5600	600	1	6500	0	30	1500	35	2	2	0
34	5000	600	1	7500	0	30	2000	38	1	1	0
35	6000	500	1	5500	0	30	1500	40	2	2	0
36	5000	400	1	5400	0	30	2000	45	1	1	0
37	5000	400	1	5500	0	30	2000	35	1	1	0
38	6000	500	2	5600	445	30	1500	45	1	1	7.94643
40	500	400	2	7500	750	30	2000	50	1	1	10

## Sheet: Herd Indicators
Se	Total animals	Total sheep	Sheep %	Sheep male	Sheep male	Non-lambing	Non-lambing	Sheep female	Sheep female	Lambs	Lambs	Lamb sales	Lamb sales	Lamb mortality	Lamb mortality	Total goats	Goats %	Goats male	Goats male	Non-kidding	Non-kidding	Goats female	Goats female	Kids	Kids	Kids sales	Kids sales	Kids mortality	Kids mortality	Males Replacement (mated)	Weaning age/day	Mortality Months	Mortality age /month	Other animals
1	419	248	59.1885	5	2.01613	11	4.43548	116	46.7742	60	24.1935	52	20.9677	4	1.6129	171	40.8115	4	2.33918	7	4.09357	80	46.7836	42	24.5614	33	19.2982	5	2.92398	2	70	12	2	1
2	633	250	39.4945	5	2	11	4.4	117	46.8	71	28.4	36	14.4	10	4	383	60.5055	9	2.34987	16	4.17755	179	46.7363	89	23.2376	75	19.5822	15	3.91645	1	60	1	11	2
3	422	239	56.6351	5	2.09205	12	5.02092	111	46.4435	65	27.1967	35	14.6444	11	4.60251	183	43.3649	5	2.73224	8	4.37158	85	46.4481	38	20.765	33	18.0328	14	7.65027	1	65	1	12	2
4	697	332	47.6327	8	2.40964	14	4.21687	155	46.6867	95	28.6145	45	13.5542	15	4.51807	365	52.3673	9	2.46575	16	4.38356	170	46.5753	86	23.5616	74	20.274	10	2.73973	2	70	12	14	1
5	662	248	37.4622	5	2.01613	11	4.43548	116	46.7742	75	30.2419	34	13.7097	7	2.82258	414	62.5378	10	2.41546	18	4.34783	193	46.6184	70	16.9082	63	15.2174	60	14.4928	1	75	12	13	1
6	407	219	53.8084	5	2.28311	10	4.56621	102	46.5753	60	27.3973	35	15.9817	7	3.19635	188	46.1916	5	2.65957	7	3.7234	88	46.8085	44	23.4043	35	18.617	9	4.78723	2	70	12	10	1
7	407	231	56.7568	5	2.1645	10	4.329	108	46.7532	55	23.8095	46	19.9134	7	3.0303	176	43.2432	5	2.84091	7	3.97727	82	46.5909	42	23.8636	31	17.6136	9	5.11364	1	72	1	13	1
8	494	305	61.7409	6	1.96721	13	4.2623	143	46.8852	91	29.8361	48	15.7377	4	1.31148	189	38.2591	6	3.1746	9	4.7619	87	46.0317	45	23.8095	38	20.1058	4	2.1164	1	70	1	2	1
9	557	330	59.246	8	2.42424	14	4.24242	154	46.6667	92	27.8788	49	14.8485	13	3.93939	227	40.754	6	2.64317	9	3.96476	106	46.696	55	24.2291	34	14.978	17	7.48899	1	45	12	15	1
10	638	321	50.3135	8	2.49221	13	4.04984	150	46.729	90	28.0374	43	13.3956	17	5.29595	317	49.6865	8	2.52366	13	4.10095	148	46.6877	65	20.5047	65	20.5047	18	5.67823	1	70	12	12	1
11	603	339	56.2189	9	2.65487	14	4.12979	158	46.6077	95	28.0236	46	13.5693	17	5.01475	264	43.7811	7	2.65152	11	4.16667	123	46.5909	60	22.7273	45	17.0455	18	6.81818	1	55	12	14	1
12	495	302	61.0101	8	2.64901	16	5.29801	139	46.0265	85	28.1457	47	15.5629	7	2.31788	193	38.9899	6	3.10881	9	4.66321	89	46.114	45	23.3161	34	17.6166	10	5.18135	2	70	12	11	1
13	546	323	59.1575	9	2.78638	12	3.71517	151	46.7492	93	28.7926	51	15.7895	7	2.16718	223	40.8425	5	2.24215	10	4.4843	104	46.6368	54	24.2152	41	18.3857	9	4.03587	1	75	12	12	1
14	590	353	59.8305	9	2.54958	18	5.09915	163	46.1756	92	26.0623	54	15.2975	17	4.81586	237	40.1695	6	2.53165	9	3.79747	111	46.8354	50	21.097	42	17.7215	19	8.01688	1	70	12	8	1
15	435	242	55.6322	6	2.47934	10	4.13223	113	46.6942	59	24.3802	47	19.4215	7	2.89256	193	44.3678	5	2.59067	8	4.14508	90	46.6321	44	22.7979	31	16.0622	15	7.77202	1	60	1	13	1
16	564	241	42.7305	6	2.48963	11	4.56432	112	46.473	55	22.8216	40	16.5975	17	7.05394	323	57.2695	9	2.78638	12	3.71517	151	46.7492	70	21.6718	62	19.195	19	5.88235	1	70	12	12	1
17	377	219	58.0902	6	2.73973	9	4.10959	102	46.5753	56	25.5708	40	18.2648	6	2.73973	158	41.9098	4	2.53165	8	5.06329	73	46.2025	35	22.1519	30	18.9873	8	5.06329	1	90	1	9	2
18	373	261	69.9732	7	2.68199	12	4.5977	121	46.3602	65	24.9042	50	19.1571	6	2.29885	112	30.0268	4	3.57143	6	5.35714	51	45.5357	25	22.3214	18	16.0714	8	7.14286	1	85	1	7	2
19	380	251	66.0526	5	1.99203	12	4.78088	117	46.6135	59	23.506	50	19.9203	8	3.18725	129	33.9474	5	3.87597	8	6.20155	58	44.9612	30	23.2558	20	15.5039	8	6.20155	1	70	12	8	2
20	400	262	65.5	8	3.05344	14	5.34351	120	45.8015	64	24.4275	50	19.084	6	2.29008	138	34.5	6	4.34783	6	4.34783	63	45.6522	30	21.7391	25	18.1159	8	5.7971	1	90	12	7	2
21	583	331	56.7753	10	3.02115	17	5.13595	152	45.9215	79	23.8671	65	19.6375	8	2.41692	252	43.2247	6	2.38095	12	4.7619	117	46.4286	60	23.8095	45	17.8571	12	4.7619	1	70	12	12	1
22	591	319	53.9763	8	2.50784	15	4.70219	148	46.395	75	23.511	66	20.6897	7	2.19436	272	46.0237	7	2.57353	17	6.25	124	45.5882	62	22.7941	50	18.3824	12	4.41176	1	65	12	11	1
23	504	239	47.4206	6	2.51046	19	7.94979	107	44.7699	56	23.431	48	20.0837	3	1.25523	265	52.5794	6	2.26415	13	4.90566	123	46.4151	65	24.5283	51	19.2453	7	2.64151	1	70	12	10	1
24	542	298	54.9815	8	2.68456	12	4.02685	139	46.6443	74	24.8322	60	20.1342	5	1.67785	244	45.0185	6	2.45902	18	7.37705	110	45.082	65	26.6393	39	15.9836	6	2.45902	2	60	1	2	1
25	446	253	56.7265	6	2.37154	11	4.34783	118	46.6403	56	22.1344	45	17.7866	17	6.71937	193	43.2735	5	2.59067	8	4.14508	90	46.6321	40	20.7254	32	16.5803	18	9.32642	1	70	12	12	1
26	477	302	63.3124	8	2.64901	14	4.63576	140	46.3576	75	24.8344	60	19.8675	5	1.65563	175	36.6876	4	2.28571	7	4	82	46.8571	45	25.7143	30	17.1429	7	4	1	75	1	2	1
27	467	307	65.7388	7	2.28013	12	3.90879	144	46.9055	78	25.4072	60	19.544	6	1.9544	160	34.2612	5	3.125	7	4.375	74	46.25	42	26.25	30	18.75	2	1.25	1	70	1	2	1
28	357	131	36.6947	4	3.05344	7	5.34351	60	45.8015	30	22.9008	23	17.5573	7	5.34351	226	63.3053	6	2.65487	8	3.53982	106	46.9027	51	22.5664	46	20.354	9	3.9823	2	80	1	1	2
29	418	216	51.6746	5	2.31481	9	4.16667	101	46.7593	52	24.0741	42	19.4444	7	3.24074	202	48.3254	5	2.47525	7	3.46535	95	47.0297	49	24.2574	37	18.3168	9	4.45545	1	70	12	12	1
30	459	300	65.3595	6	2	12	4	141	47	74	24.6667	60	20	7	2.33333	159	34.6405	5	3.14465	8	5.03145	73	45.9119	38	23.8994	30	18.8679	5	3.14465	2	75	1	1	1
31	449	232	51.6704	7	3.01724	9	3.87931	108	46.5517	55	23.7069	46	19.8276	7	3.01724	217	48.3296	6	2.76498	9	4.14747	101	46.5438	52	23.9631	40	18.4332	9	4.14747	1	70	12	12	1
32	521	261	50.096	8	3.06513	11	4.21456	121	46.3602	65	24.9042	50	19.1571	6	2.29885	260	49.904	7	2.69231	15	5.76923	119	45.7692	60	23.0769	50	19.2308	9	3.46154	1	80	1	10	1
33	362	232	64.0884	7	3.01724	9	3.87931	108	46.5517	56	24.1379	45	19.3966	7	3.01724	130	35.9116	4	3.07692	4	3.07692	61	46.9231	30	23.0769	22	16.9231	9	6.92308	1	70	12	14	1
34	482	327	67.8423	9	2.75229	14	4.28135	152	46.4832	79	24.159	65	19.8777	8	2.44648	155	32.1577	4	2.58065	7	4.51613	72	46.4516	41	26.4516	30	19.3548	1	0.645161	2	75	12	12	1
35	534	310	58.0524	9	2.90323	13	4.19355	144	46.4516	75	24.1935	62	20	7	2.25806	224	41.9476	5	2.23214	9	4.01786	105	46.875	55	24.5536	43	19.1964	7	3.125	2	70	1	1	1
36	678	300	44.2478	8	2.66667	12	4	140	46.6667	74	24.6667	58	19.3333	8	2.66667	378	55.7522	9	2.38095	19	5.02646	175	46.2963	90	23.8095	75	19.8413	10	2.6455	1	65	12	12	1
37	666	325	48.7988	7	2.15385	14	4.30769	152	46.7692	90	27.6923	55	16.9231	7	2.15385	341	51.2012	8	2.34604	17	4.98534	158	46.3343	80	23.4604	68	19.9413	10	2.93255	1	60	12	13	1
38	500	323	64.6	8	2.47678	13	4.02477	151	46.7492	80	24.7678	65	20.1238	6	1.85759	177	35.4	4	2.25989	9	5.08475	82	46.3277	44	24.8588	30	16.9492	8	4.51977	1	90	1	10	2
39	557	368	66.0682	10	2.71739	16	4.34783	171	46.4674	90	24.4565	75	20.3804	6	1.63043	189	33.9318	6	3.1746	7	3.7037	88	46.5608	50	26.455	30	15.873	8	4.2328	1	75	1	9	2
40	526	351	66.73	9	2.5641	14	3.9886	164	46.7236	92	26.2108	65	18.5185	7	1.9943	175	33.27	5	2.85714	8	4.57143	81	46.2857	42	24	30	17.1429	9	5.14286	1	85	1	1	2
41	598	381	63.7124	11	2.88714	16	4.19948	177	46.4567	85	22.3097	75	19.685	17	4.46194	217	36.2876	5	2.30415	8	3.68664	102	47.0046	45	20.7373	38	17.5115	19	8.75576	2	45	12	12	1
42	424	298	70.283	8	2.68456	14	4.69799	138	46.3087	70	23.4899	62	20.8054	6	2.01342	126	29.717	4	3.1746	6	4.7619	58	46.0317	30	23.8095	20	15.873	8	6.34921	1	60	1	7	2
43	526	345	65.5894	9	2.6087	14	4.05797	161	46.6667	90	26.087	65	18.8406	6	1.73913	181	34.4106	5	2.76243	8	4.41989	84	46.4088	46	25.4144	30	16.5746	8	4.41989	1	65	1	8	2
44	329	142	43.1611	4	2.8169	6	4.22535	66	46.4789	35	24.6479	25	17.6056	6	4.22535	187	56.8389	6	3.20856	7	3.74332	87	46.5241	45	24.0642	34	18.1818	8	4.27807	2	70	1	1	2
45	508	309	60.8268	6	1.94175	17	5.50162	143	46.2783	91	29.4498	46	14.8867	6	1.94175	199	39.1732	6	3.01508	9	4.52261	92	46.2312	44	22.1106	35	17.5879	13	6.53266	2	75	12	12	1
46	541	333	61.5527	8	2.4024	13	3.9039	156	46.8468	92	27.6276	58	17.4174	6	1.8018	208	38.4473	7	3.36538	11	5.28846	95	45.6731	49	23.5577	33	15.8654	13	6.25	2	80	12	14	1
47	622	325	52.2508	9	2.76923	18	5.53846	149	45.8462	70	21.5385	65	20	14	4.30769	297	47.7492	9	3.0303	16	5.38721	136	45.7912	80	26.936	42	14.1414	14	4.7138	1	90	1	2	1
48	594	387	65.1515	10	2.58398	17	4.39276	180	46.5116	90	23.2558	78	20.155	12	3.10078	207	34.8485	5	2.41546	10	4.83092	96	46.3768	45	21.7391	38	18.3575	13	6.28019	1	45	12	11	1
49	391	156	39.8977	6	3.84615	8	5.12821	71	45.5128	35	22.4359	24	15.3846	12	7.69231	235	60.1023	6	2.55319	15	6.38298	107	45.5319	48	20.4255	42	17.8723	17	7.23404	1	65	12	10	1
50	500	273	54.6	5	1.8315	16	5.86081	126	46.1538	65	23.8095	55	20.1465	6	2.1978	227	45.4	7	3.0837	14	6.1674	103	45.3744	52	22.9075	44	19.3833	7	3.0837	2	70	1	1	1
51	446	251	56.278	5	1.99203	12	4.78088	117	46.6135	65	25.8964	44	17.5299	8	3.18725	195	43.722	5	2.5641	8	4.10256	91	46.6667	46	23.5897	35	17.9487	10	5.12821	1	85	12	12	1
52	511	274	53.6204	8	2.91971	16	5.83942	125	45.6204	69	25.1825	49	17.8832	7	2.55474	237	46.3796	6	2.53165	9	3.79747	111	46.8354	55	23.2068	44	18.5654	12	5.06329	2	60	12	11	1
53	490	270	55.102	6	2.22222	18	6.66667	123	45.5556	72	26.6667	44	16.2963	7	2.59259	220	44.898	7	3.18182	11	5	101	45.9091	52	23.6364	40	18.1818	9	4.09091	1	70	12	8	2

## Sheet: Herd Indicators-%
Se	Total animals	Sheep %	Sheep male%	Non-lambing%	Ewe birth %	Sheep female%	Lambs%	Lamb sales %	Lamb mortality %	Lamb survival %	Goats %	Goats male%	Non-kidding%	Doe birth %	Goats female%	Kids %	Kids sales %	Kids mortality %	kid survival %	Males Replacement (mated)	Weaning age /day	Mortality Months	Mortality age /month	Other animals
9	557	59.246	2.42424	4.24242	95.7576	46.6667	27.8788	14.8485	3.93939	96.0606	40.754	2.64317	3.96476	96.0352	46.696	24.2291	14.978	7.48899	92.511	1	45	12	15	1		DATA KHALED;
41	598	63.7124	2.88714	4.19948	95.8005	46.4567	22.3097	19.685	4.46194	95.5381	36.2876	2.30415	3.68664	96.3134	47.0046	20.7373	17.5115	8.75576	91.2442	2	45	12	12	1		INPUT SE TO SH SM NL EB SF L LS LM LSR GO GM NK DB GF K KS KM KSR MR WA MM MA OA;
48	594	65.1515	2.58398	4.39276	95.6072	46.5116	23.2558	20.155	3.10078	96.8992	34.8485	2.41546	4.83092	95.1691	46.3768	21.7391	18.3575	6.28019	93.7198	1	45	12	11	1		CARDS;
11	603	56.2189	2.65487	4.12979	95.8702	46.6077	28.0236	13.5693	5.01475	94.9853	43.7811	2.65152	4.16667	95.8333	46.5909	22.7273	17.0455	6.81818	93.1818	1	55	12	14	1		…
2	633	39.4945	2	4.4	95.6	46.8	28.4	14.4	4	96	60.5055	2.34987	4.17755	95.8225	46.7363	23.2376	19.5822	3.91645	96.0836	1	60	1	11	2		;
15	435	55.6322	2.47934	4.13223	95.8678	46.6942	24.3802	19.4215	2.89256	97.1074	44.3678	2.59067	4.14508	95.8549	46.6321	22.7979	16.0622	7.77202	92.228	1	60	1	13	1		PROC FREQ DATA=KHALED;
24	542	54.9815	2.68456	4.02685	95.9732	46.6443	24.8322	20.1342	1.67785	98.3221	45.0185	2.45902	7.37705	92.623	45.082	26.6393	15.9836	2.45902	97.541	2	60	1	2	1		TABLES MR MM OA /NOCUM NOROW NOCOL;
37	666	48.7988	2.15385	4.30769	95.6923	46.7692	27.6923	16.9231	2.15385	97.8462	51.2012	2.34604	4.98534	95.0147	46.3343	23.4604	19.9413	2.93255	97.0674	1	60	12	13	1		PROC MEANS N MEAN STDERR; VAR TO SH SM NL EB SF L LS LM LSR GO GM NK DB GF K KS KM KSR WA MA;
42	424	70.283	2.68456	4.69799	95.302	46.3087	23.4899	20.8054	2.01342	97.9866	29.717	3.1746	4.7619	95.2381	46.0317	23.8095	15.873	6.34921	93.6508	1	60	1	7	2		RUN;
52	511	53.6204	2.91971	5.83942	94.1606	45.6204	25.1825	17.8832	2.55474	97.4453	46.3796	2.53165	3.79747	96.2025	46.8354	23.2068	18.5654	5.06329	94.9367	2	60	12	11	1
3	422	56.6351	2.09205	5.02092	94.9791	46.4435	27.1967	14.6444	4.60251	95.3975	43.3649	2.73224	4.37158	95.6284	46.4481	20.765	18.0328	7.65027	92.3497	1	65	1	12	2
22	591	53.9763	2.50784	4.70219	95.2978	46.395	23.511	20.6897	2.19436	97.8056	46.0237	2.57353	6.25	93.75	45.5882	22.7941	18.3824	4.41176	95.5882	1	65	12	11	1		MR	Frequency	Percent
36	678	44.2478	2.66667	4	96	46.6667	24.6667	19.3333	2.66667	97.3333	55.7522	2.38095	5.02646	94.9735	46.2963	23.8095	19.8413	2.6455	97.3545	1	65	12	12	1		1	38	71.7
43	526	65.5894	2.6087	4.05797	95.942	46.6667	26.087	18.8406	1.73913	98.2609	34.4106	2.76243	4.41989	95.5801	46.4088	25.4144	16.5746	4.41989	95.5801	1	65	1	8	2		2	15	28.3
49	391	39.8977	3.84615	5.12821	94.8718	45.5128	22.4359	15.3846	7.69231	92.3077	60.1023	2.55319	6.38298	93.617	45.5319	20.4255	17.8723	7.23404	92.766	1	65	12	10	1
1	419	59.1885	2.01613	4.43548	95.5645	46.7742	24.1935	20.9677	1.6129	98.3871	40.8115	2.33918	4.09357	95.9064	46.7836	24.5614	19.2982	2.92398	97.076	2	70	12	2	1		MM	Frequency	Percent
4	697	47.6327	2.40964	4.21687	95.7831	46.6867	28.6145	13.5542	4.51807	95.4819	52.3673	2.46575	4.38356	95.6164	46.5753	23.5616	20.274	2.73973	97.2603	2	70	12	14	1		1	22	41.51
6	407	53.8084	2.28311	4.56621	95.4338	46.5753	27.3973	15.9817	3.19635	96.8037	46.1916	2.65957	3.7234	96.2766	46.8085	23.4043	18.617	4.78723	95.2128	2	70	12	10	1		12	31	58.49
8	494	61.7409	1.96721	4.2623	95.7377	46.8852	29.8361	15.7377	1.31148	98.6885	38.2591	3.1746	4.7619	95.2381	46.0317	23.8095	20.1058	2.1164	97.8836	1	70	1	2	1
10	638	50.3135	2.49221	4.04984	95.9502	46.729	28.0374	13.3956	5.29595	94.704	49.6865	2.52366	4.10095	95.8991	46.6877	20.5047	20.5047	5.67823	94.3218	1	70	12	12	1		OA	Frequency	Percent
12	495	61.0101	2.64901	5.29801	94.702	46.0265	28.1457	15.5629	2.31788	97.6821	38.9899	3.10881	4.66321	95.3368	46.114	23.3161	17.6166	5.18135	94.8187	2	70	12	11	1		1	39	73.58
14	590	59.8305	2.54958	5.09915	94.9008	46.1756	26.0623	15.2975	4.81586	95.1841	40.1695	2.53165	3.79747	96.2025	46.8354	21.097	17.7215	8.01688	91.9831	1	70	12	8	1		2	14	26.42
16	564	42.7305	2.48963	4.56432	95.4357	46.473	22.8216	16.5975	7.05394	92.9461	57.2695	2.78638	3.71517	96.2848	46.7492	21.6718	19.195	5.88235	94.1176	1	70	12	12	1
19	380	66.0526	1.99203	4.78088	95.2191	46.6135	23.506	19.9203	3.18725	96.8127	33.9474	3.87597	6.20155	93.7984	44.9612	23.2558	15.5039	6.20155	93.7984	1	70	12	8	2		Variable	N	Mean	Std Error
21	583	56.7753	3.02115	5.13595	94.864	45.9215	23.8671	19.6375	2.41692	97.5831	43.2247	2.38095	4.7619	95.2381	46.4286	23.8095	17.8571	4.7619	95.2381	1	70	12	12	1		TO	53	503.736	12.6633
23	504	47.4206	2.51046	7.94979	92.0502	44.7699	23.431	20.0837	1.25523	98.7448	52.5794	2.26415	4.90566	95.0943	46.4151	24.5283	19.2453	2.64151	97.3585	1	70	12	10	1		SH	53	56.4811	1.17032
25	446	56.7265	2.37154	4.34783	95.6522	46.6403	22.1344	17.7866	6.71937	93.2806	43.2735	2.59067	4.14508	95.8549	46.6321	20.7254	16.5803	9.32642	90.6736	1	70	12	12	1		SM	53	2.53396	0.0532638
27	467	65.7388	2.28013	3.90879	96.0912	46.9055	25.4072	19.544	1.9544	98.0456	34.2612	3.125	4.375	95.625	46.25	26.25	18.75	1.25	98.75	1	70	1	2	1		NL	53	4.59245	0.104813
29	418	51.6746	2.31481	4.16667	95.8333	46.7593	24.0741	19.4444	3.24074	96.7593	48.3254	2.47525	3.46535	96.5347	47.0297	24.2574	18.3168	4.45545	95.5446	1	70	12	12	1		SF	53	46.4415	0.0583042
31	449	51.6704	3.01724	3.87931	96.1207	46.5517	23.7069	19.8276	3.01724	96.9828	48.3296	2.76498	4.14747	95.8525	46.5438	23.9631	18.4332	4.14747	95.8525	1	70	12	12	1		L	53	25.3396	0.29387
33	362	64.0884	3.01724	3.87931	96.1207	46.5517	24.1379	19.3966	3.01724	96.9828	35.9116	3.07692	3.07692	96.9231	46.9231	23.0769	16.9231	6.92308	93.0769	1	70	12	14	1		LS	53	18.0132	0.31073
35	534	58.0524	2.90323	4.19355	95.8065	46.4516	24.1935	20	2.25806	97.7419	41.9476	2.23214	4.01786	95.9821	46.875	24.5536	19.1964	3.125	96.875	2	70	1	1	1		LM	53	3.07547	0.200397
44	329	43.1611	2.8169	4.22535	95.7746	46.4789	24.6479	17.6056	4.22535	95.7746	56.8389	3.20856	3.74332	96.2567	46.5241	24.0642	18.1818	4.27807	95.7219	2	70	1	1	2		GO	53	43.5189	1.17032
50	500	54.6	1.8315	5.86081	94.1392	46.1538	23.8095	20.1465	2.1978	97.8022	45.4	3.0837	6.1674	93.8326	45.3744	22.9075	19.3833	3.0837	96.9163	2	70	1	1	1		GM	53	2.7566	0.0595404
53	490	55.102	2.22222	6.66667	93.3333	45.5556	26.6667	16.2963	2.59259	97.4074	44.898	3.18182	5	95	45.9091	23.6364	18.1818	4.09091	95.9091	1	70	12	8	2		NK	53	4.58302	0.116359
7	407	56.7568	2.1645	4.329	95.671	46.7532	23.8095	19.9134	3.0303	96.9697	43.2432	2.84091	3.97727	96.0227	46.5909	23.8636	17.6136	5.11364	94.8864	1	72	1	13	1		GF	53	46.3302	0.0674857
5	662	37.4622	2.01613	4.43548	95.5645	46.7742	30.2419	13.7097	2.82258	97.1774	62.5378	2.41546	4.34783	95.6522	46.6184	16.9082	15.2174	14.4928	85.5072	1	75	12	13	1		K	53	23.3472	0.24974
13	546	59.1575	2.78638	3.71517	96.2848	46.7492	28.7926	15.7895	2.16718	97.8328	40.8425	2.24215	4.4843	95.5157	46.6368	24.2152	18.3857	4.03587	95.9641	1	75	12	12	1		KS	53	17.9132	0.207481
26	477	63.3124	2.64901	4.63576	95.3642	46.3576	24.8344	19.8675	1.65563	98.3444	36.6876	2.28571	4	96	46.8571	25.7143	17.1429	4	96	1	75	1	2	1		KM	53	5.07547	0.315836
30	459	65.3595	2	4	96	47	24.6667	20	2.33333	97.6667	34.6405	3.14465	5.03145	94.9686	45.9119	23.8994	18.8679	3.14465	96.8553	2	75	1	1	1		WA	53	70.3208	1.42209
34	482	67.8423	2.75229	4.28135	95.7187	46.4832	24.159	19.8777	2.44648	97.5535	32.1577	2.58065	4.51613	95.4839	46.4516	26.4516	19.3548	0.645161	99.3548	2	75	12	12	1		MA	53	8.92453	0.613023
39	557	66.0682	2.71739	4.34783	95.6522	46.4674	24.4565	20.3804	1.63043	98.3696	33.9318	3.1746	3.7037	96.2963	46.5608	26.455	15.873	4.2328	95.7672	1	75	1	9	2
45	508	60.8268	1.94175	5.50162	94.4984	46.2783	29.4498	14.8867	1.94175	98.0583	39.1732	3.01508	4.52261	95.4774	46.2312	22.1106	17.5879	6.53266	93.4673	2	75	12	12	1		Variable	N	Mean	Std Error
28	357	36.6947	3.05344	5.34351	94.6565	45.8015	22.9008	17.5573	5.34351	94.6565	63.3053	2.65487	3.53982	96.4602	46.9027	22.5664	20.354	3.9823	96.0177	2	80	1	1	2		TO	53	503.736	12.6633
32	521	50.096	3.06513	4.21456	95.7854	46.3602	24.9042	19.1571	2.29885	97.7011	49.904	2.69231	5.76923	94.2308	45.7692	23.0769	19.2308	3.46154	96.5385	1	80	1	10	1		SH	53	56.4811	1.17032
46	541	61.5527	2.4024	3.9039	96.0961	46.8468	27.6276	17.4174	1.8018	98.1982	38.4473	3.36538	5.28846	94.7115	45.6731	23.5577	15.8654	6.25	93.75	2	80	12	14	1		SM	53	2.53396	0.0532638
18	373	69.9732	2.68199	4.5977	95.4023	46.3602	24.9042	19.1571	2.29885	97.7011	30.0268	3.57143	5.35714	94.6429	45.5357	22.3214	16.0714	7.14286	92.8571	1	85	1	7	2		NL	53	4.59245	0.104813
40	526	66.73	2.5641	3.9886	96.0114	46.7236	26.2108	18.5185	1.9943	98.0057	33.27	2.85714	4.57143	95.4286	46.2857	24	17.1429	5.14286	94.8571	1	85	1	1	2		EB	53	95.4075	0.104813
51	446	56.278	1.99203	4.78088	95.2191	46.6135	25.8964	17.5299	3.18725	96.8127	43.722	2.5641	4.10256	95.8974	46.6667	23.5897	17.9487	5.12821	94.8718	1	85	12	12	1		SF	53	46.4415	0.0583042
17	377	58.0902	2.73973	4.10959	95.8904	46.5753	25.5708	18.2648	2.73973	97.2603	41.9098	2.53165	5.06329	94.9367	46.2025	22.1519	18.9873	5.06329	94.9367	1	90	1	9	2		L	53	25.3396	0.29387
20	400	65.5	3.05344	5.34351	94.6565	45.8015	24.4275	19.084	2.29008	97.7099	34.5	4.34783	4.34783	95.6522	45.6522	21.7391	18.1159	5.7971	94.2029	1	90	12	7	2		LS	53	18.0132	0.31073
38	500	64.6	2.47678	4.02477	95.9752	46.7492	24.7678	20.1238	1.85759	98.1424	35.4	2.25989	5.08475	94.9153	46.3277	24.8588	16.9492	4.51977	95.4802	1	90	1	10	2		LM	53	3.07547	0.200397
47	622	52.2508	2.76923	5.53846	94.4615	45.8462	21.5385	20	4.30769	95.6923	47.7492	3.0303	5.38721	94.6128	45.7912	26.936	14.1414	4.7138	95.2862	1	90	1	2	1		LSR	53	96.9245	0.200397
																										GO	53	43.5189	1.17032
																										GM	53	2.7566	0.0595404
																										NK	53	4.58302	0.116359
																										DB	53	95.4189	0.115838
																										GF	53	46.3302	0.0674857
																										K	53	23.3472	0.24974
																										KS	53	17.9132	0.207481
																										KM	53	5.07547	0.315836
																										KSR	53	94.9283	0.31614
																										WA	53	70.3208	1.42209
																										MA	53	8.92453	0.613023

## Sheet: MODELS
Se	Total animals	Sheep %	Sheep male%	Non-lambing%	Sheep female%	Lambs%	Lamb sales%	Lamb mortality %	Goats %	Goats male%	Non-kidding%	Goats female%	Kids %	Kids sales %	Kids mortality %	Males Replacement (mated)	Weaning age /day	Mortality Months	Mortality age /month	Other animals	Age of the Breeder /Year	Level of education	Experience /YEARS	Land ownership	Land cultivation (CROPS)	Fodder cultivation	Annual return	Revenue /Animal
1	419	59.1885	2.01613	4.43548	46.7742	24.1935	20.9677	1.6129	40.8115	2.33918	4.09357	46.7836	24.5614	19.2982	2.92398	2	70	12	2	1	66	2	14	2	2	2	600	60
2	633	39.4945	2	4.4	46.8	28.4	14.4	4	60.5055	2.34987	4.17755	46.7363	23.2376	19.5822	3.91645	1	60	1	11	2	50	3	15	1	1	2	3000	37
3	422	56.6351	2.09205	5.02092	46.4435	27.1967	14.6444	4.60251	43.3649	2.73224	4.37158	46.4481	20.765	18.0328	7.65027	1	65	1	12	2	60	3	30	2	2	2	2000	35
4	697	47.6327	2.40964	4.21687	46.6867	28.6145	13.5542	4.51807	52.3673	2.46575	4.38356	46.5753	23.5616	20.274	2.73973	2	70	12	14	1	72	1	23	1	1	1	1450	40
5	662	37.4622	2.01613	4.43548	46.7742	30.2419	13.7097	2.82258	62.5378	2.41546	4.34783	46.6184	16.9082	15.2174	14.4928	1	75	12	13	1	65	2	12	1	2	2	650	40
6	407	53.8084	2.28311	4.56621	46.5753	27.3973	15.9817	3.19635	46.1916	2.65957	3.7234	46.8085	23.4043	18.617	4.78723	2	70	12	10	1	65	2	20	1	1	1	1500	40
7	407	56.7568	2.1645	4.329	46.7532	23.8095	19.9134	3.0303	43.2432	2.84091	3.97727	46.5909	23.8636	17.6136	5.11364	1	72	1	13	1	65	2	25	1	2	2	1300	40
8	494	61.7409	1.96721	4.2623	46.8852	29.8361	15.7377	1.31148	38.2591	3.1746	4.7619	46.0317	23.8095	20.1058	2.1164	1	70	1	2	1	60	3	12	2	2	2	1400	60
9	557	59.246	2.42424	4.24242	46.6667	27.8788	14.8485	3.93939	40.754	2.64317	3.96476	46.696	24.2291	14.978	7.48899	1	45	12	15	1	65	2	12	1	1	2	1500	40
10	638	50.3135	2.49221	4.04984	46.729	28.0374	13.3956	5.29595	49.6865	2.52366	4.10095	46.6877	20.5047	20.5047	5.67823	1	70	12	12	1	70	1	25	1	1	2	1500	40
11	603	56.2189	2.65487	4.12979	46.6077	28.0236	13.5693	5.01475	43.7811	2.65152	4.16667	46.5909	22.7273	17.0455	6.81818	1	55	12	14	1	65	1	25	2	2	2	1500	40
12	495	61.0101	2.64901	5.29801	46.0265	28.1457	15.5629	2.31788	38.9899	3.10881	4.66321	46.114	23.3161	17.6166	5.18135	2	70	12	11	1	65	3	23	1	1	1	850	40
13	546	59.1575	2.78638	3.71517	46.7492	28.7926	15.7895	2.16718	40.8425	2.24215	4.4843	46.6368	24.2152	18.3857	4.03587	1	75	12	12	1	55	3	12	1	1	1	850	40
14	590	59.8305	2.54958	5.09915	46.1756	26.0623	15.2975	4.81586	40.1695	2.53165	3.79747	46.8354	21.097	17.7215	8.01688	1	70	12	8	1	65	2	12	1	1	1	1500	50
15	435	55.6322	2.47934	4.13223	46.6942	24.3802	19.4215	2.89256	44.3678	2.59067	4.14508	46.6321	22.7979	16.0622	7.77202	1	60	1	13	1	65	2	12	1	2	2	1500	40
16	564	42.7305	2.48963	4.56432	46.473	22.8216	16.5975	7.05394	57.2695	2.78638	3.71517	46.7492	21.6718	19.195	5.88235	1	70	12	12	1	55	3	12	1	1	1	1500	40
17	377	58.0902	2.73973	4.10959	46.5753	25.5708	18.2648	2.73973	41.9098	2.53165	5.06329	46.2025	22.1519	18.9873	5.06329	1	90	1	9	2	55	3	15	2	2	1	1450	40
18	373	69.9732	2.68199	4.5977	46.3602	24.9042	19.1571	2.29885	30.0268	3.57143	5.35714	45.5357	22.3214	16.0714	7.14286	1	85	1	7	2	45	2	20	2	1	1	1300	30
19	380	66.0526	1.99203	4.78088	46.6135	23.506	19.9203	3.18725	33.9474	3.87597	6.20155	44.9612	23.2558	15.5039	6.20155	1	70	12	8	2	60	3	20	1	2	2	1400	45
20	400	65.5	3.05344	5.34351	45.8015	24.4275	19.084	2.29008	34.5	4.34783	4.34783	45.6522	21.7391	18.1159	5.7971	1	90	12	7	2	55	2	20	1	2	2	1350	45
21	583	56.7753	3.02115	5.13595	45.9215	23.8671	19.6375	2.41692	43.2247	2.38095	4.7619	46.4286	23.8095	17.8571	4.7619	1	70	12	12	1	66	2	30	1	1	2	2500	45
22	591	53.9763	2.50784	4.70219	46.395	23.511	20.6897	2.19436	46.0237	2.57353	6.25	45.5882	22.7941	18.3824	4.41176	1	65	12	11	1	76	2	30	1	1	2	2500	45
23	504	47.4206	2.51046	7.94979	44.7699	23.431	20.0837	1.25523	52.5794	2.26415	4.90566	46.4151	24.5283	19.2453	2.64151	1	70	12	10	1	65	1	12	2	1	1	1500	40
24	542	54.9815	2.68456	4.02685	46.6443	24.8322	20.1342	1.67785	45.0185	2.45902	7.37705	45.082	26.6393	15.9836	2.45902	2	60	1	2	1	60	1	30	1	2	2	2000	60
25	446	56.7265	2.37154	4.34783	46.6403	22.1344	17.7866	6.71937	43.2735	2.59067	4.14508	46.6321	20.7254	16.5803	9.32642	1	70	12	12	1	65	1	12	1	1	2	1400	40
26	477	63.3124	2.64901	4.63576	46.3576	24.8344	19.8675	1.65563	36.6876	2.28571	4	46.8571	25.7143	17.1429	4	1	75	1	2	1	60	2	14	1	1	1	2000	40
27	467	65.7388	2.28013	3.90879	46.9055	25.4072	19.544	1.9544	34.2612	3.125	4.375	46.25	26.25	18.75	1.25	1	70	1	2	1	60	3	14	2	2	2	2000	30
28	357	36.6947	3.05344	5.34351	45.8015	22.9008	17.5573	5.34351	63.3053	2.65487	3.53982	46.9027	22.5664	20.354	3.9823	2	80	1	1	2	45	3	15	2	1	2	1500	40
29	418	51.6746	2.31481	4.16667	46.7593	24.0741	19.4444	3.24074	48.3254	2.47525	3.46535	47.0297	24.2574	18.3168	4.45545	1	70	12	12	1	62	2	30	2	1	1	2500	45
30	459	65.3595	2	4	47	24.6667	20	2.33333	34.6405	3.14465	5.03145	45.9119	23.8994	18.8679	3.14465	2	75	1	1	1	60	2	30	1	2	2	1500	35
31	449	51.6704	3.01724	3.87931	46.5517	23.7069	19.8276	3.01724	48.3296	2.76498	4.14747	46.5438	23.9631	18.4332	4.14747	1	70	12	12	1	62	3	20	1	1	1	2500	55
32	521	50.096	3.06513	4.21456	46.3602	24.9042	19.1571	2.29885	49.904	2.69231	5.76923	45.7692	23.0769	19.2308	3.46154	1	80	1	10	1	60	2	25	2	1	1	1500	50
33	362	64.0884	3.01724	3.87931	46.5517	24.1379	19.3966	3.01724	35.9116	3.07692	3.07692	46.9231	23.0769	16.9231	6.92308	1	70	12	14	1	50	2	25	2	1	1	2000	45
34	482	67.8423	2.75229	4.28135	46.4832	24.159	19.8777	2.4	32.1577	2.58065	4.51613	46.4516	26.4516	19.3548	0.645161	2	75	12	12	1	70	2	30	1	1	1	2000	38
35	534	58.0524	2.90323	4.19355	46.4516	24.1935	20	2.25806	41.9476	2.23214	4.01786	46.875	24.5536	19.1964	3.125	2	70	1	1	1	60	3	30	1	2	2	1500	40
36	678	44.2478	2.66667	4	46.6667	24.6667	19.3333	2.66667	55.7522	2.38095	5.02646	46.2963	23.8095	19.8413	2.6455	1	65	12	12	1	51	3	30	1	1	1	2000	45
37	666	48.7988	2.15385	4.30769	46.7692	27.6923	16.9231	2.15385	51.2012	2.34604	4.98534	46.3343	23.4604	19.9413	2.93255	1	60	12	13	1	51	3	30	1	1	1	2000	35
38	500	64.6	2.47678	4.02477	46.7492	24.7678	20.1238	1.85759	35.4	2.25989	5.08475	46.3277	24.8588	16.9492	4.51977	1	90	1	10	2	40	2	30	2	1	1	1500	45
39	557	66.0682	2.71739	4.34783	46.4674	24.4565	20.3804	1.63043	33.9318	3.1746	3.7037	46.5608	26.455	15.873	4.2328	1	75	1	9	2	45	2	20	1	1	1	1500	40
40	526	66.73	2.5641	3.9886	46.7236	26.2108	18.5185	1.9943	33.27	2.85714	4.57143	46.2857	24	17.1429	5.14286	1	85	1	1	2	45	3	30	2	1	1	2000	50
41	598	63.7124	2.88714	4.19948	46.4567	22.3097	19.685	4.46194	36.2876	2.30415	3.68664	47.0046	20.7373	17.5115	8.75576	2	45	12	12	1	65	2	12	1	2	2	1500	40
42	424	70.283	2.68456	4.69799	46.3087	23.4899	20.8054	2.01342	29.717	3.1746	4.7619	46.0317	23.8095	15.873	6.34921	1	60	1	7	2	50	3	25	1	1	1	2000	60
43	526	65.5894	2.6087	4.05797	46.6667	26.087	18.8406	1.73913	34.4106	2.76243	4.41989	46.4088	25.4144	16.5746	4.41989	1	65	1	8	2	60	3	25	1	1	1	1500	50
44	329	43.1611	2.8169	4.22535	46.4789	24.6479	17.6056	4.22535	56.8389	3.20856	3.74332	46.5241	24.0642	18.1818	4.27807	2	70	1	1	2	46	3	16	2	1	2	1400	45
45	508	60.8268	1.94175	5.50162	46.2783	29.4498	14.8867	1.94175	39.1732	3.01508	4.52261	46.2312	22.1106	17.5879	6.53266	2	75	12	12	1	55	3	13	1	1	1	1000	20
46	541	61.5527	2.4024	3.9039	46.8468	27.6276	17.4174	1.8018	38.4473	3.36538	5.28846	45.6731	23.5577	15.8654	6.25	2	80	12	14	1	60	3	14	1	1	1	1500	30
47	622	52.2508	2.76923	5.53846	45.8462	21.5385	20	4.30769	47.7492	3.0303	5.38721	45.7912	26.936	14.1414	4.7138	1	90	1	2	1	55	3	14	2	2	2	1000	45
48	594	65.1515	2.58398	4.39276	46.5116	23.2558	20.155	3.10078	34.8485	2.41546	4.83092	46.3768	21.7391	18.3575	6.28019	1	45	12	11	1	65	2	12	1	1	1	1500	40
49	391	39.8977	3.84615	5.12821	45.5128	22.4359	15.3846	7.69231	60.1023	2.55319	6.38298	45.5319	20.4255	17.8723	7.23404	1	65	12	10	1	55	2	12	1	2	2	1500	40
50	500	54.6	1.8315	5.86081	46.1538	23.8095	20.1465	2.1978	45.4	3.0837	6.1674	45.3744	22.9075	19.3833	3.0837	2	70	1	1	1	50	2	10	1	2	2	850	45
51	446	56.278	1.99203	4.78088	46.6135	25.8964	17.5299	3.18725	43.722	2.5641	4.10256	46.6667	23.5897	17.9487	5.12821	1	85	12	12	1	65	2	12	1	1	1	1500	40
52	511	53.6204	2.91971	5.83942	45.6204	25.1825	17.8832	2.55474	46.3796	2.53165	3.79747	46.8354	23.2068	18.5654	5.06329	2	60	12	11	1	65	2	20	1	1	1	1500	50
53	490	55.102	2.22222	6.66667	45.5556	26.6667	16.2963	2.59259	44.898	3.18182	5	45.9091	23.6364	18.1818	4.09091	1	70	12	8	2	45	2	25	2	1	1	2000	50
*MODEL-1											*MODEL-2											*MODEL-3
DATA KHALED;											DATA KHALED;											DATA KHALED;
INPUT SE TO SH SM NL SF L LS LM GO GM NG GF K KS KM RM WA MM MA OA AB LE EX LO LC FC AR RA;											INPUT SE TO SH SM NL SF L LS LM GO GM NG GF K KS KM RM WA MM MA OA AB LE EX LO LC FC AR RA;											INPUT SE TO SH SM NL SF L LS LM GO GM NG GF K KS KM RM WA MM MA OA AB LE EX LO LC FC AR RA;
CARDS;											CARDS;											CARDS;
…											…											…
;											;											;
PROC GLM;											PROC FREQ DATA=KHALED;											PROC GLM;
CLASS LE;											TABLES RM*MA RM*LM RM*GM RM*EX RM*LE /CHISQ NOROW NOCOL NOPERCENT;											CLASS LO LC FC;
MODEL TO = LE EX AB LE*EX LE*AB EX*AB /Solution SS3;											RUN;											MODEL AR RA = LO LC FC LS KS /Solution SS3;
MEANS LE /DUNCAN;																						MEANS LO LC FC /DUNCAN;
RUN;																						RUN;
												*PERSON CORR
*MODEL-4
												DATA KHALED;
DATA KHALED;												INPUT SE TO SH SM NL SF L LS LM GO GM NG GF K KS KM RM WA MM MA OA AB LE EX LO LC FC AR RA;
INPUT SE TO SH SM NL SF L LS LM GO GM NG GF K KS KM RM WA MM MA OA AB LE EX LO LC FC AR RA;												CARDS;
CARDS;												…
…												;
;												PROC CORR; VAR SH SM NL SF L LS LM ;
PROC GLM;												RUN;
CLASS OA MM LE;												PROC CORR; VAR GO GM NG GF K KS KM ;
MODEL LM GM MA = OA MM LE EX WA /Solution SS3;												RUN;
MEANS OA MM LE /DUNCAN;
RUN;
																		Level of education	Experience /YEARS	Land ownership	Land cultivation (CROPS)	Fodder cultivation		*SEARMAN CORR
																		1	10	1	1	1
																		1	12	1	1	1		DATA KHALED;
Variable	SHEEP%	GOATS%																1	12	1	1	1		INPUT LE EX LO LC FC;
Total Animals	56.4811	43.5189																1	12	1	1	1		CARDS;
Males	2.53396	2.7566																1	12	1	1	1		…
Non-pregnant	4.59245	4.58302																1	12	1	1	1		;
Birth ewes	46.4415	46.3302																2	12	1	1	1		PROC CORR SPEARMAN; VAR LE EX LO LC FC;
Newborns	25.3396	23.3472																2	12	1	1	1		RUN;
Animal solds	18.0132	17.9132																2	12	1	1	1
Animal mortalities	3.07547	5.07547																2	12	1	1	1
																		2	12	1	1	1
																		2	12	1	1	1
																		2	12	1	1	1
																		2	12	1	1	1
																		2	13	1	1	1
																		2	14	1	1	1
																		2	14	1	1	1
																		2	14	1	1	1
																		2	14	1	1	1
																		2	14	1	1	1
																		2	15	1	1	1
																		2	15	1	1	1
																		2	15	1	1	1
																		2	16	1	1	1
																		2	20	1	1	1
																		2	20	1	1	1
																		2	20	1	1	1
																		2	20	1	1	1
																		2	20	1	1	2
																		2	20	1	1	2
																		2	20	1	1	2
																		2	23	1	1	2
																		3	23	1	1	2
																		3	25	1	1	2
																		3	25	1	1	2
																		3	25	1	2	2
																		3	25	2	2	2
																		3	25	2	2	2
																		3	25	2	2	2
																		3	25	2	2	2
																		3	25	2	2	2
																		3	30	2	2	2
																		3	30	2	2	2
																		3	30	2	2	2
																		3	30	2	2	2
																		3	30	2	2	2
																		3	30	2	2	2
																		3	30	2	2	2
																		3	30	2	2	2
																		3	30	2	2	2
																		3	30	2	2	2
																		3	30	2	2	2
																		3	30	2	2	2

## Sheet: Sustainability 
Se	Total animals	Sheep %	Sheep male%	Non-lambing%	Ewe birth %	Sheep female%	Lambs%	Lamb sales %	Lamb mortality %	Lamb survival %	Goats %	Goats male%	Non-kidding%	Doe birth %	Goats female%	Kids %	Kids sales %	Kids mortality %	kid survival %	Males Replacement (mated)	Weaning age /day	Mortality Months	Mortality age /month	Other animals
10	638	50.3135	2.49221	4.04984	95.9502	46.729	28.0374	13.3956	5.29595	94.704	49.6865	2.52366	4.10095	95.8991	46.6877	20.5047	20.5047	5.67823	94.3218	1	70	12	12	1
28	357	36.6947	3.05344	5.34351	94.6565	45.8015	22.9008	17.5573	5.34351	94.6565	63.3053	2.65487	3.53982	96.4602	46.9027	22.5664	20.354	3.9823	96.0177	2	80	1	1	2
4	697	47.6327	2.40964	4.21687	95.7831	46.6867	28.6145	13.5542	4.51807	95.4819	52.3673	2.46575	4.38356	95.6164	46.5753	23.5616	20.274	2.73973	97.2603	2	70	12	14	1
8	494	61.7409	1.96721	4.2623	95.7377	46.8852	29.8361	15.7377	1.31148	98.6885	38.2591	3.1746	4.7619	95.2381	46.0317	23.8095	20.1058	2.1164	97.8836	1	70	1	2	1
37	666	48.7988	2.15385	4.30769	95.6923	46.7692	27.6923	16.9231	2.15385	97.8462	51.2012	2.34604	4.98534	95.0147	46.3343	23.4604	19.9413	2.93255	97.0674	1	60	12	13	1
36	678	44.2478	2.66667	4	96	46.6667	24.6667	19.3333	2.66667	97.3333	55.7522	2.38095	5.02646	94.9735	46.2963	23.8095	19.8413	2.6455	97.3545	1	65	12	12	1
2	633	39.4945	2	4.4	95.6	46.8	28.4	14.4	4	96	60.5055	2.34987	4.17755	95.8225	46.7363	23.2376	19.5822	3.91645	96.0836	1	60	1	11	2
50	500	54.6	1.8315	5.86081	94.1392	46.1538	23.8095	20.1465	2.1978	97.8022	45.4	3.0837	6.1674	93.8326	45.3744	22.9075	19.3833	3.0837	96.9163	2	70	1	1	1
34	482	67.8423	2.75229	4.28135	95.7187	46.4832	24.159	19.8777	2.44648	97.5535	32.1577	2.58065	4.51613	95.4839	46.4516	26.4516	19.3548	0.645161	99.3548	2	75	12	12	1
1	419	59.1885	2.01613	4.43548	95.5645	46.7742	24.1935	20.9677	1.6129	98.3871	40.8115	2.33918	4.09357	95.9064	46.7836	24.5614	19.2982	2.92398	97.076	2	70	12	2	1
23	504	47.4206	2.51046	7.94979	92.0502	44.7699	23.431	20.0837	1.25523	98.7448	52.5794	2.26415	4.90566	95.0943	46.4151	24.5283	19.2453	2.64151	97.3585	1	70	12	10	1
32	521	50.096	3.06513	4.21456	95.7854	46.3602	24.9042	19.1571	2.29885	97.7011	49.904	2.69231	5.76923	94.2308	45.7692	23.0769	19.2308	3.46154	96.5385	1	80	1	10	1
35	534	58.0524	2.90323	4.19355	95.8065	46.4516	24.1935	20	2.25806	97.7419	41.9476	2.23214	4.01786	95.9821	46.875	24.5536	19.1964	3.125	96.875	2	70	1	1	1
16	564	42.7305	2.48963	4.56432	95.4357	46.473	22.8216	16.5975	7.05394	92.9461	57.2695	2.78638	3.71517	96.2848	46.7492	21.6718	19.195	5.88235	94.1176	1	70	12	12	1
17	377	58.0902	2.73973	4.10959	95.8904	46.5753	25.5708	18.2648	2.73973	97.2603	41.9098	2.53165	5.06329	94.9367	46.2025	22.1519	18.9873	5.06329	94.9367	1	90	1	9	2
30	459	65.3595	2	4	96	47	24.6667	20	2.33333	97.6667	34.6405	3.14465	5.03145	94.9686	45.9119	23.8994	18.8679	3.14465	96.8553	2	75	1	1	1
27	467	65.7388	2.28013	3.90879	96.0912	46.9055	25.4072	19.544	1.9544	98.0456	34.2612	3.125	4.375	95.625	46.25	26.25	18.75	1.25	98.75	1	70	1	2	1
6	407	53.8084	2.28311	4.56621	95.4338	46.5753	27.3973	15.9817	3.19635	96.8037	46.1916	2.65957	3.7234	96.2766	46.8085	23.4043	18.617	4.78723	95.2128	2	70	12	10	1
52	511	53.6204	2.91971	5.83942	94.1606	45.6204	25.1825	17.8832	2.55474	97.4453	46.3796	2.53165	3.79747	96.2025	46.8354	23.2068	18.5654	5.06329	94.9367	2	60	12	11	1
31	449	51.6704	3.01724	3.87931	96.1207	46.5517	23.7069	19.8276	3.01724	96.9828	48.3296	2.76498	4.14747	95.8525	46.5438	23.9631	18.4332	4.14747	95.8525	1	70	12	12	1
13	546	59.1575	2.78638	3.71517	96.2848	46.7492	28.7926	15.7895	2.16718	97.8328	40.8425	2.24215	4.4843	95.5157	46.6368	24.2152	18.3857	4.03587	95.9641	1	75	12	12	1
22	591	53.9763	2.50784	4.70219	95.2978	46.395	23.511	20.6897	2.19436	97.8056	46.0237	2.57353	6.25	93.75	45.5882	22.7941	18.3824	4.41176	95.5882	1	65	12	11	1
48	594	65.1515	2.58398	4.39276	95.6072	46.5116	23.2558	20.155	3.10078	96.8992	34.8485	2.41546	4.83092	95.1691	46.3768	21.7391	18.3575	6.28019	93.7198	1	45	12	11	1
29	418	51.6746	2.31481	4.16667	95.8333	46.7593	24.0741	19.4444	3.24074	96.7593	48.3254	2.47525	3.46535	96.5347	47.0297	24.2574	18.3168	4.45545	95.5446	1	70	12	12	1
53	490	55.102	2.22222	6.66667	93.3333	45.5556	26.6667	16.2963	2.59259	97.4074	44.898	3.18182	5	95	45.9091	23.6364	18.1818	4.09091	95.9091	1	70	12	8	2
44	329	43.1611	2.8169	4.22535	95.7746	46.4789	24.6479	17.6056	4.22535	95.7746	56.8389	3.20856	3.74332	96.2567	46.5241	24.0642	18.1818	4.27807	95.7219	2	70	1	1	2
20	400	65.5	3.05344	5.34351	94.6565	45.8015	24.4275	19.084	2.29008	97.7099	34.5	4.34783	4.34783	95.6522	45.6522	21.7391	18.1159	5.7971	94.2029	1	90	12	7	2
3	422	56.6351	2.09205	5.02092	94.9791	46.4435	27.1967	14.6444	4.60251	95.3975	43.3649	2.73224	4.37158	95.6284	46.4481	20.765	18.0328	7.65027	92.3497	1	65	1	12	2
51	446	56.278	1.99203	4.78088	95.2191	46.6135	25.8964	17.5299	3.18725	96.8127	43.722	2.5641	4.10256	95.8974	46.6667	23.5897	17.9487	5.12821	94.8718	1	85	12	12	1
49	391	39.8977	3.84615	5.12821	94.8718	45.5128	22.4359	15.3846	7.69231	92.3077	60.1023	2.55319	6.38298	93.617	45.5319	20.4255	17.8723	7.23404	92.766	1	65	12	10	1
21	583	56.7753	3.02115	5.13595	94.864	45.9215	23.8671	19.6375	2.41692	97.5831	43.2247	2.38095	4.7619	95.2381	46.4286	23.8095	17.8571	4.7619	95.2381	1	70	12	12	1
14	590	59.8305	2.54958	5.09915	94.9008	46.1756	26.0623	15.2975	4.81586	95.1841	40.1695	2.53165	3.79747	96.2025	46.8354	21.097	17.7215	8.01688	91.9831	1	70	12	8	1
12	495	61.0101	2.64901	5.29801	94.702	46.0265	28.1457	15.5629	2.31788	97.6821	38.9899	3.10881	4.66321	95.3368	46.114	23.3161	17.6166	5.18135	94.8187	2	70	12	11	1
7	407	56.7568	2.1645	4.329	95.671	46.7532	23.8095	19.9134	3.0303	96.9697	43.2432	2.84091	3.97727	96.0227	46.5909	23.8636	17.6136	5.11364	94.8864	1	72	1	13	1
45	508	60.8268	1.94175	5.50162	94.4984	46.2783	29.4498	14.8867	1.94175	98.0583	39.1732	3.01508	4.52261	95.4774	46.2312	22.1106	17.5879	6.53266	93.4673	2	75	12	12	1
41	598	63.7124	2.88714	4.19948	95.8005	46.4567	22.3097	19.685	4.46194	95.5381	36.2876	2.30415	3.68664	96.3134	47.0046	20.7373	17.5115	8.75576	91.2442	2	45	12	12	1
26	477	63.3124	2.64901	4.63576	95.3642	46.3576	24.8344	19.8675	1.65563	98.3444	36.6876	2.28571	4	96	46.8571	25.7143	17.1429	4	96	1	75	1	2	1
40	526	66.73	2.5641	3.9886	96.0114	46.7236	26.2108	18.5185	1.9943	98.0057	33.27	2.85714	4.57143	95.4286	46.2857	24	17.1429	5.14286	94.8571	1	85	1	1	2
11	603	56.2189	2.65487	4.12979	95.8702	46.6077	28.0236	13.5693	5.01475	94.9853	43.7811	2.65152	4.16667	95.8333	46.5909	22.7273	17.0455	6.81818	93.1818	1	55	12	14	1
38	500	64.6	2.47678	4.02477	95.9752	46.7492	24.7678	20.1238	1.85759	98.1424	35.4	2.25989	5.08475	94.9153	46.3277	24.8588	16.9492	4.51977	95.4802	1	90	1	10	2
33	362	64.0884	3.01724	3.87931	96.1207	46.5517	24.1379	19.3966	3.01724	96.9828	35.9116	3.07692	3.07692	96.9231	46.9231	23.0769	16.9231	6.92308	93.0769	1	70	12	14	1
25	446	56.7265	2.37154	4.34783	95.6522	46.6403	22.1344	17.7866	6.71937	93.2806	43.2735	2.59067	4.14508	95.8549	46.6321	20.7254	16.5803	9.32642	90.6736	1	70	12	12	1
43	526	65.5894	2.6087	4.05797	95.942	46.6667	26.087	18.8406	1.73913	98.2609	34.4106	2.76243	4.41989	95.5801	46.4088	25.4144	16.5746	4.41989	95.5801	1	65	1	8	2
18	373	69.9732	2.68199	4.5977	95.4023	46.3602	24.9042	19.1571	2.29885	97.7011	30.0268	3.57143	5.35714	94.6429	45.5357	22.3214	16.0714	7.14286	92.8571	1	85	1	7	2
15	435	55.6322	2.47934	4.13223	95.8678	46.6942	24.3802	19.4215	2.89256	97.1074	44.3678	2.59067	4.14508	95.8549	46.6321	22.7979	16.0622	7.77202	92.228	1	60	1	13	1
24	542	54.9815	2.68456	4.02685	95.9732	46.6443	24.8322	20.1342	1.67785	98.3221	45.0185	2.45902	7.37705	92.623	45.082	26.6393	15.9836	2.45902	97.541	2	60	1	2	1
39	557	66.0682	2.71739	4.34783	95.6522	46.4674	24.4565	20.3804	1.63043	98.3696	33.9318	3.1746	3.7037	96.2963	46.5608	26.455	15.873	4.2328	95.7672	1	75	1	9	2
42	424	70.283	2.68456	4.69799	95.302	46.3087	23.4899	20.8054	2.01342	97.9866	29.717	3.1746	4.7619	95.2381	46.0317	23.8095	15.873	6.34921	93.6508	1	60	1	7	2
46	541	61.5527	2.4024	3.9039	96.0961	46.8468	27.6276	17.4174	1.8018	98.1982	38.4473	3.36538	5.28846	94.7115	45.6731	23.5577	15.8654	6.25	93.75	2	80	12	14	1
19	380	66.0526	1.99203	4.78088	95.2191	46.6135	23.506	19.9203	3.18725	96.8127	33.9474	3.87597	6.20155	93.7984	44.9612	23.2558	15.5039	6.20155	93.7984	1	70	12	8	2
5	662	37.4622	2.01613	4.43548	95.5645	46.7742	30.2419	13.7097	2.82258	97.1774	62.5378	2.41546	4.34783	95.6522	46.6184	16.9082	15.2174	14.4928	85.5072	1	75	12	13	1
9	557	59.246	2.42424	4.24242	95.7576	46.6667	27.8788	14.8485	3.93939	96.0606	40.754	2.64317	3.96476	96.0352	46.696	24.2291	14.978	7.48899	92.511	1	45	12	15	1
47	622	52.2508	2.76923	5.53846	94.4615	45.8462	21.5385	20	4.30769	95.6923	47.7492	3.0303	5.38721	94.6128	45.7912	26.936	14.1414	4.7138	95.2862	1	90	1	2	1
									Sheep	Ewe birth	Lambs	Lamb survival	Lamb sales
									25	32	20	40	30
									28	21	33	13	23
									53	53	53	53	53
									47.1698	60.3774	37.7358	75.4717	56.6038
									52.8302	39.6226	62.2642	24.5283	43.3962
									Goats	Doe birth	Kids	Kid survival	Kid sales
									24	29	28	25	37
									29	24	25	28	16
									53	53	53	53	53
									45.283	54.717	52.8302	47.1698	69.8113
									54.717	45.283	47.1698	52.8302	30.1887
